# Supplementary material for: Accessible chemical space for metal nitride perovskites
Source: Royal Society of Chemistry journal article supplement (doi:10.1039/d3sc02171h), 2023-01-01
Supplement: d3sc02171h1.pdf [file d3sc02171h1.pdf]

# Supplemental Information: Accessible Chemical Space for Metal Nitride Perovskites

Bastien F. Grosso,<sup>†</sup> Daniel W. Davies,<sup>†</sup> Bonan Zhu,<sup>†</sup> Aron Walsh,<sup>\*,‡</sup> and David O.  
Scanlon<sup>\*,†</sup>

<sup>†</sup>*Department of Chemistry, University College London, London, United Kingdom*

<sup>‡</sup>*Department of Materials, Imperial College London, London, United Kingdom*

E-mail: a.walsh@imperial.ac.uk; d.scanlon@ucl.ac.uk

We present in Fig. S1 to Fig. S8, the effect of the 15 octahedral tilts on the energy of each of the 279 candidates, after one loop of electronic relaxation (dashed lines) and after full relaxation of the ions and lattice (continuous lines).

In Fig. S9 to Fig. S13, we present, for each of the 25 closed-shell candidates, the electronic band structure and density of states for the (A) and (G) structures as well as their respective crystal structures.

Table 1 and 2, contain the convergence parameters for the 25 candidates presented in the main text and for the 86 competing phases used to compute the energy hull, respectively. The corresponding structure can be found in the data repository provided ([https://github.com/SMTG-UCL/High\\_throughput\\_search\\_ABN3](https://github.com/SMTG-UCL/High_throughput_search_ABN3)). Finally, the list of the pseudopotentials used is presented in Table 3.

Table 1: Convergence parameters of the 25 candidates presented in the main text.

|                    | Glazer |        | AIRSS |        |
|--------------------|--------|--------|-------|--------|
|                    | Encut  | k-mesh | Encut | k-mesh |
| GaMoN <sub>3</sub> | 450    | 3x5x4  | 450   | 5x8x3  |
| GaWN <sub>3</sub>  | 450    | 6x6x5  | 450   | 11x6x4 |
| HfNbN <sub>3</sub> | 450    | 4x3x2  | 450   | 9x4x2  |
| HfSbN <sub>3</sub> | 450    | 5x5x3  | 450   | 9x5x3  |
| HfTaN <sub>3</sub> | 500    | 4x3x2  | 500   | 5x4x3  |
| HfVN <sub>3</sub>  | 450    | 4x5x4  | 450   | 9x4x2  |
| InMoN <sub>3</sub> | 550    | 4x5x6  | 550   | 5x2x3  |
| InWN <sub>3</sub>  | 450    | 4x5x4  | 450   | 7x7x7  |
| LaMoN <sub>3</sub> | 450    | 5x7x6  | 450   | 7x7x6  |
| LaWN <sub>3</sub>  | 450    | 7x7x7  | 450   | 7x7x2  |
| ScMoN <sub>3</sub> | 450    | 6x6x4  | 450   | 9x4x3  |
| ScWN <sub>3</sub>  | 450    | 4x5x6  | 450   | 9x4x3  |
| SnNbN <sub>3</sub> | 450    | 5x6x4  | 450   | 11x5x3 |
| SnSbN <sub>3</sub> | 450    | 5x5x4  | 450   | 7x7x7  |
| SnTaN <sub>3</sub> | 450    | 5x5x4  | 450   | 5x4x4  |
| SnVN <sub>3</sub>  | 450    | 5x5x4  | 450   | 4x4x3  |
| TiVN <sub>3</sub>  | 450    | 2x5x5  | 450   | 9x5x4  |
| TlMoN <sub>3</sub> | 550    | 4x5x6  | 550   | 3x5x5  |
| TlWN <sub>3</sub>  | 450    | 6x6x6  | 450   | 9x6x3  |
| YMoN <sub>3</sub>  | 450    | 5x6x6  | 450   | 5x5x4  |
| YWN <sub>3</sub>   | 450    | 5x5x6  | 450   | 4x4x4  |
| ZrNbN <sub>3</sub> | 450    | 4x4x4  | 450   | 9x5x4  |
| ZrSbN <sub>3</sub> | 450    | 5x5x4  | 450   | 5x3x4  |
| ZrTaN <sub>3</sub> | 450    | 4x4x3  | 450   | 5x4x5  |
| ZrVN <sub>3</sub>  | 450    | 2x6x6  | 450   | 9x4x3  |

Table 2: List of the competing phases and convergence parameters. The energy cutoff (Encut) and k-mesh grid (k-mesh) are indicated next to each materials.

| Material                                        | Encut | k-mesh   | Material                          | Encut | k-mesh   | Material                                      | Encut | k-mesh   |
|-------------------------------------------------|-------|----------|-----------------------------------|-------|----------|-----------------------------------------------|-------|----------|
| Ga <sub>1</sub> N <sub>1</sub>                  | 500   | 7x7x7    | N <sub>4</sub>                    | 750   | 8x8x6    | Tl <sub>3</sub>                               | 400   | 11x11x11 |
| Ga <sub>2</sub> Mo <sub>6</sub>                 | 400   | 8x8x8    | N <sub>8</sub>                    | 750   | 9x9x9    | Tl <sub>29</sub>                              | 400   | 6x6x6    |
| Ga <sub>2</sub> N <sub>2</sub>                  | 450   | 8x8x5    | N <sub>8</sub>                    | 750   | 9x9x9    | V <sub>1</sub>                                | 500   | 17x17x17 |
| Ga <sub>4</sub>                                 | 400   | 6x6x6    | Nb <sub>1</sub>                   | 400   | 17x17x17 | V <sub>1</sub> N <sub>1</sub>                 | 500   | 9x9x9    |
| Ga <sub>4</sub>                                 | 350   | 12x12x11 | Nb <sub>1</sub> N <sub>1</sub>    | 500   | 10x10x8  | V <sub>4</sub> Sn <sub>8</sub>                | 400   | 6x7x6    |
| Ga <sub>41</sub> Mo <sub>8</sub>                | 400   | 5x5x5    | Nb <sub>4</sub> Sn <sub>8</sub>   | 350   | 8x8x8    | V <sub>6</sub> N <sub>3</sub>                 | 450   | 5x5x5    |
| Ga <sub>62</sub> Mo <sub>12</sub>               | 400   | 4x4x2    | Nb <sub>6</sub> N <sub>3</sub>    | 450   | 6x6x5    | V <sub>6</sub> Sn <sub>2</sub>                | 450   | 9x9x9    |
| Hf <sub>1</sub> N <sub>1</sub>                  | 500   | 11x11x11 | Nb <sub>6</sub> Sn <sub>2</sub>   | 400   | 10x10x10 | V <sub>16</sub> N <sub>2</sub>                | 450   | 4x4x10   |
| Hf <sub>2</sub>                                 | 450   | 11x11x6  | Nb <sub>10</sub> N <sub>12</sub>  | 500   | 7x7x3    | W <sub>1</sub>                                | 450   | 16x16x16 |
| Hf <sub>3</sub> N <sub>2</sub>                  | 450   | 8x8x8    | Nb <sub>12</sub> Sn <sub>10</sub> | 400   | 3x3x5    | W <sub>4</sub> N <sub>6</sub>                 | 750   | 6x6x5    |
| Hf <sub>4</sub> N <sub>2</sub>                  | 500   | 5x5x11   | Sb <sub>2</sub>                   | 300   | 11x11x11 | Y <sub>1</sub> N <sub>1</sub>                 | 550   | 8x8x8    |
| Hf <sub>4</sub> Sb <sub>4</sub>                 | 300   | 11x11x11 | Sc <sub>1</sub> N <sub>1</sub>    | 450   | 9x9x9    | Y <sub>2</sub>                                | 400   | 18x18x10 |
| Hf <sub>6</sub> Sb <sub>6</sub>                 | 350   | 7x7x2    | Sc <sub>2</sub>                   | 450   | 9x9x5    | Y <sub>3</sub>                                | 400   | 13x13x13 |
| Hf <sub>8</sub> Sb <sub>16</sub>                | 300   | 12x4x2   | Sn <sub>1</sub> Sb <sub>1</sub>   | 450   | 15x15x15 | Y <sub>4</sub>                                | 400   | 9x9x3    |
| Hf <sub>10</sub> Sb <sub>18</sub>               | 350   | 4x4x4    | Sn <sub>2</sub>                   | 400   | 11x11x11 | Y <sub>4</sub> W <sub>4</sub> N <sub>12</sub> | 450   | 4x4x4    |
| Hf <sub>12</sub> N <sub>16</sub>                | 500   | 5x5x2    | Ta <sub>1</sub>                   | 450   | 11x11x11 | Zr <sub>1</sub> N <sub>1</sub>                | 550   | 16x16x16 |
| Hf <sub>12</sub> Sb <sub>4</sub>                | 350   | 5x5x4    | Ta <sub>3</sub> N <sub>3</sub>    | 700   | 7x7x11   | Zr <sub>2</sub>                               | 450   | 16x16x9  |
| Hf <sub>20</sub> Sb <sub>12</sub>               | 350   | 3x3x3    | Ta <sub>4</sub> Sn <sub>8</sub>   | 450   | 10x10x10 | Zr <sub>4</sub> N <sub>2</sub>                | 450   | 5x5x11   |
| In <sub>1</sub> N <sub>1</sub>                  | 500   | 8x8x8    | Ta <sub>6</sub> N <sub>3</sub>    | 450   | 9x9x8    | Zr <sub>4</sub> Sb <sub>2</sub>               | 450   | 7x7x9    |
| In <sub>2</sub> N <sub>2</sub>                  | 500   | 8x8x4    | Ta <sub>6</sub> N <sub>10</sub>   | 700   | 7x7x3    | Zr <sub>4</sub> Sb <sub>4</sub>               | 400   | 10x10x10 |
| In <sub>3</sub>                                 | 450   | 14x14x14 | Ta <sub>6</sub> Sn <sub>2</sub>   | 450   | 10x10x10 | Zr <sub>6</sub> Sb <sub>6</sub>               | 400   | 9x9x3    |
| La <sub>1</sub>                                 | 350   | 16x16x16 | Ta <sub>30</sub>                  | 400   | 4x4x6    | Zr <sub>8</sub> Sb <sub>16</sub>              | 400   | 7x3x2    |
| La <sub>2</sub> N <sub>2</sub>                  | 550   | 7x7x4    | Ta <sub>30</sub>                  | 400   | 4x4x6    | Zr <sub>10</sub> Sb <sub>6</sub>              | 400   | 4x4x5    |
| La <sub>2</sub> W <sub>2</sub> N <sub>6</sub>   | 450   | 5x5x5    | Ti <sub>1</sub> N <sub>1</sub>    | 450   | 16x16x16 | Zr <sub>12</sub> N <sub>16</sub>              | 550   | 7x3x3    |
| La <sub>4</sub>                                 | 350   | 13x13x4  | Ti <sub>2</sub>                   | 400   | 9x9x5    | Zr <sub>12</sub> Sb <sub>4</sub>              | 450   | 7x7x4    |
| La <sub>4</sub> Mo <sub>4</sub> N <sub>12</sub> | 750   | 2x2x3    | Ti <sub>3</sub>                   | 400   | 7x7x11   | Zr <sub>20</sub> Sb <sub>12</sub>             | 400   | 4x3x3    |
| Mo <sub>1</sub>                                 | 400   | 17x17x17 | Ti <sub>4</sub> N <sub>2</sub>    | 450   | 7x7x11   | Zr <sub>22</sub> Sb <sub>36</sub>             | 300   | 4x4x1    |
| Mo <sub>4</sub> N <sub>2</sub>                  | 450   | 6x6x8    | Tl <sub>1</sub>                   | 400   | 24x24x24 | Zr <sub>28</sub> Sb <sub>16</sub>             | 300   | 2x3x3    |
| Mo <sub>8</sub> N <sub>8</sub>                  | 550   | 6x6x6    | Tl <sub>2</sub>                   | 400   | 16x16x8  |                                               |       |          |

Table 3: List of pseudopotentials used for each atom.

---

PAW\_PBE Ga\_d 06Jul2010  
PAW\_PBE Mo\_pv 04Feb2005  
PAW\_PBE N 08Apr2002  
PAW\_PBE W\_sv 04Sep2015  
PAW\_PBE Hf\_pv 06Sep2000  
PAW\_PBE Nb\_pv 08Apr2002  
PAW\_PBE Sb 06Sep2000  
PAW\_PBE Ta\_pv 07Sep2000  
PAW\_PBE V\_pv 07Sep2000  
PAW\_PBE In\_d 06Sep2000  
PAW\_PBE La 06Sep2000  
PAW\_PBE Sc\_sv 07Sep2000  
PAW\_PBE Sn\_d 06Sep2000  
PAW\_PBE Ti\_pv 07Sep2000  
PAW\_PBE Tl\_d 06Sep2000  
PAW\_PBE Y\_sv 25May2007  
PAW\_PBE Zr\_sv 04Jan2005

---

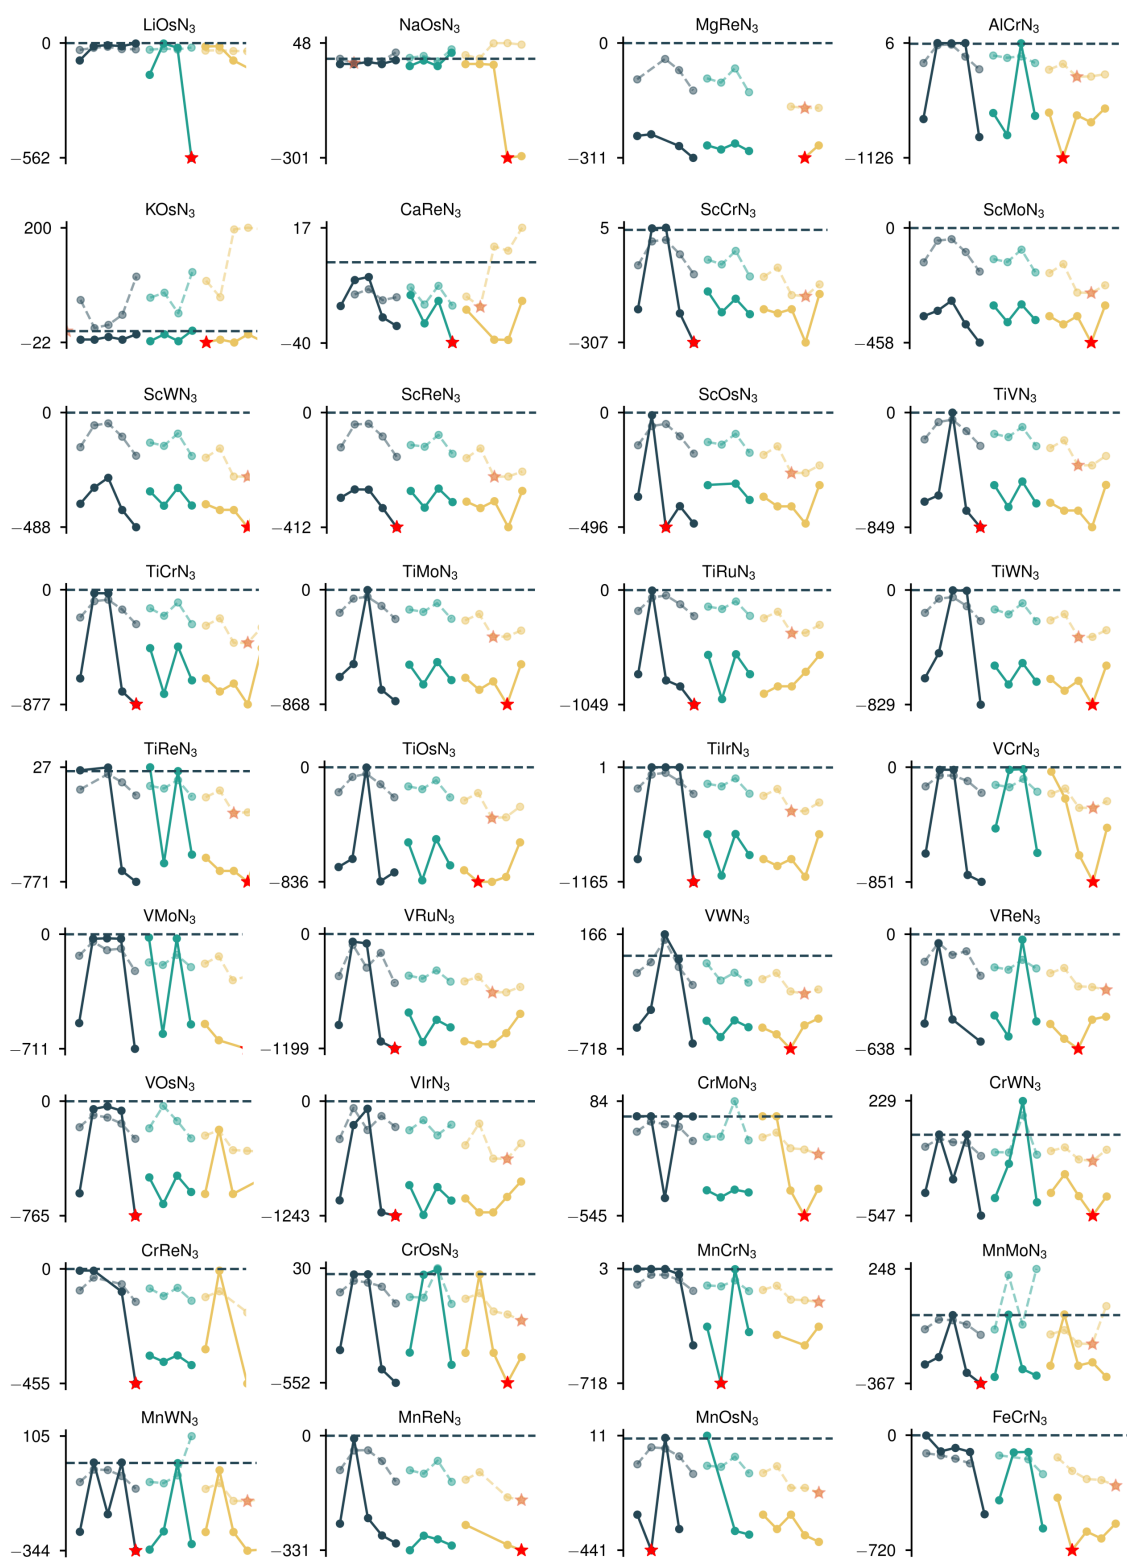

Figure S1: Energy of tilts for fixed ions (dashed lines) and full relaxation (continuous lines)

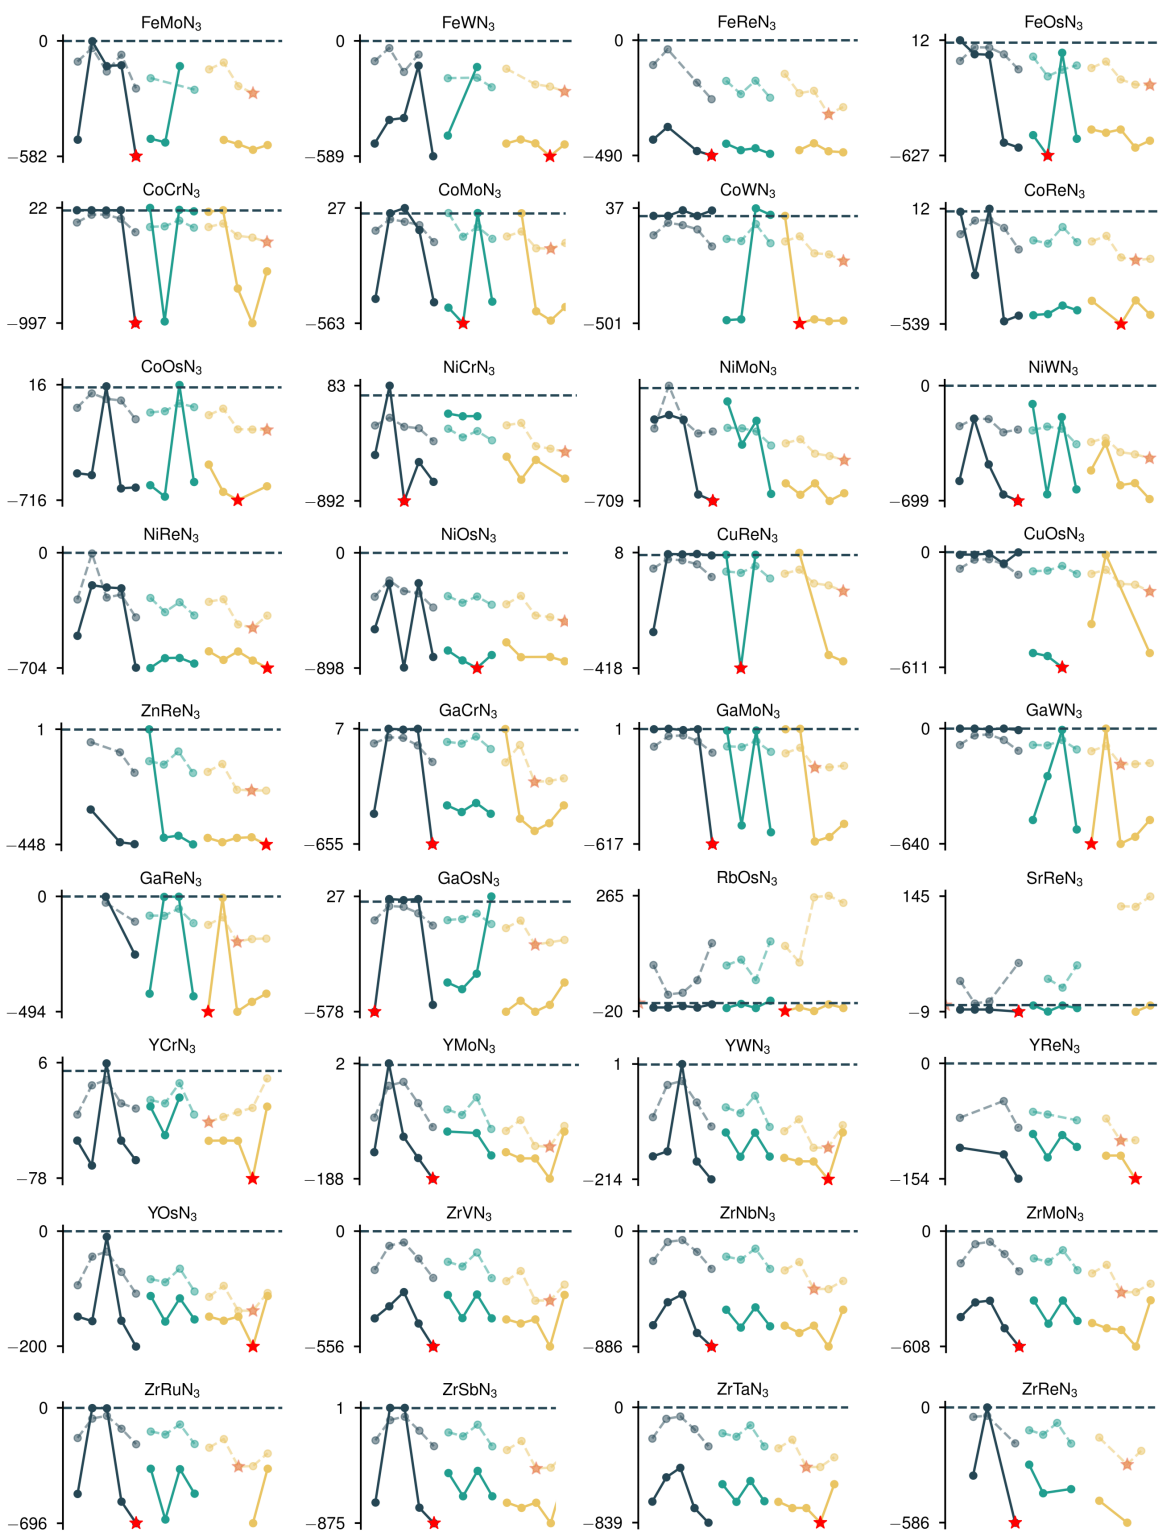

Figure S2: Energy of tilts for fixed ions (dashed lines) and full relaxation (continuous lines)

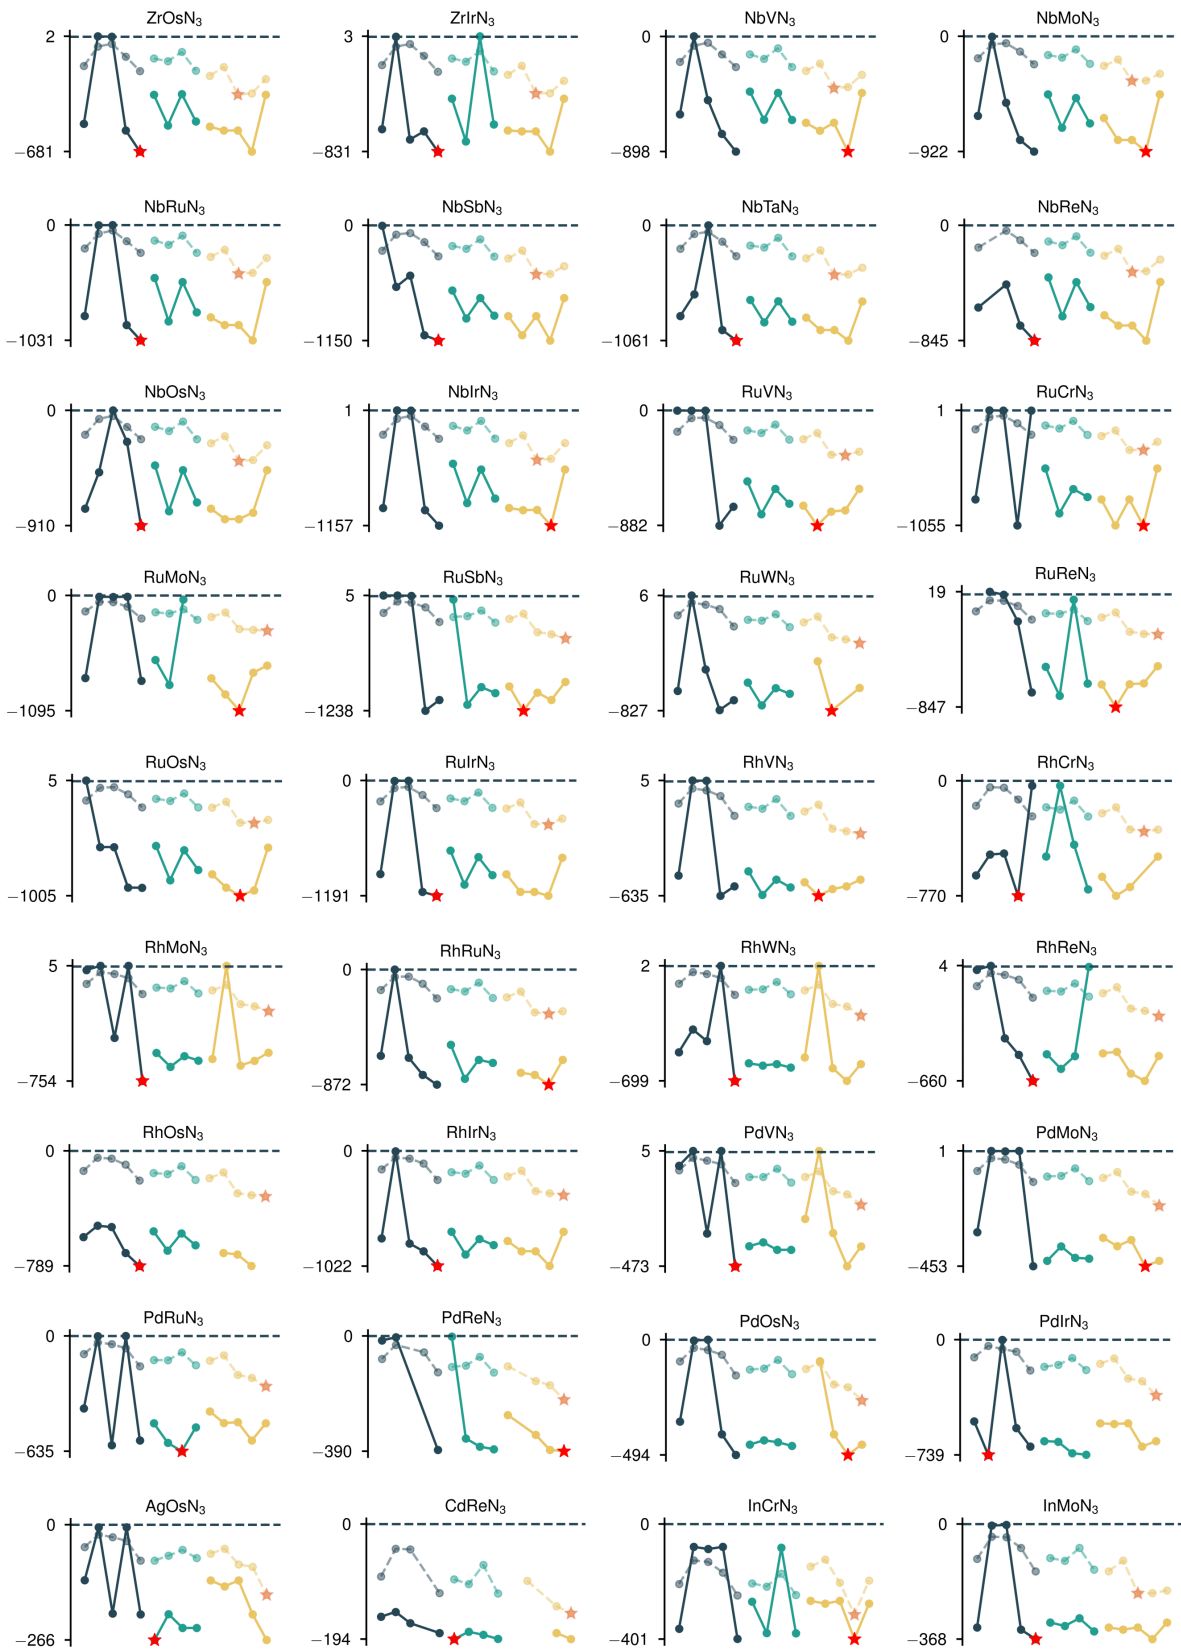

Figure S3: Energy of tilts for fixed ions (dashed lines) and full relaxation (continuous lines)

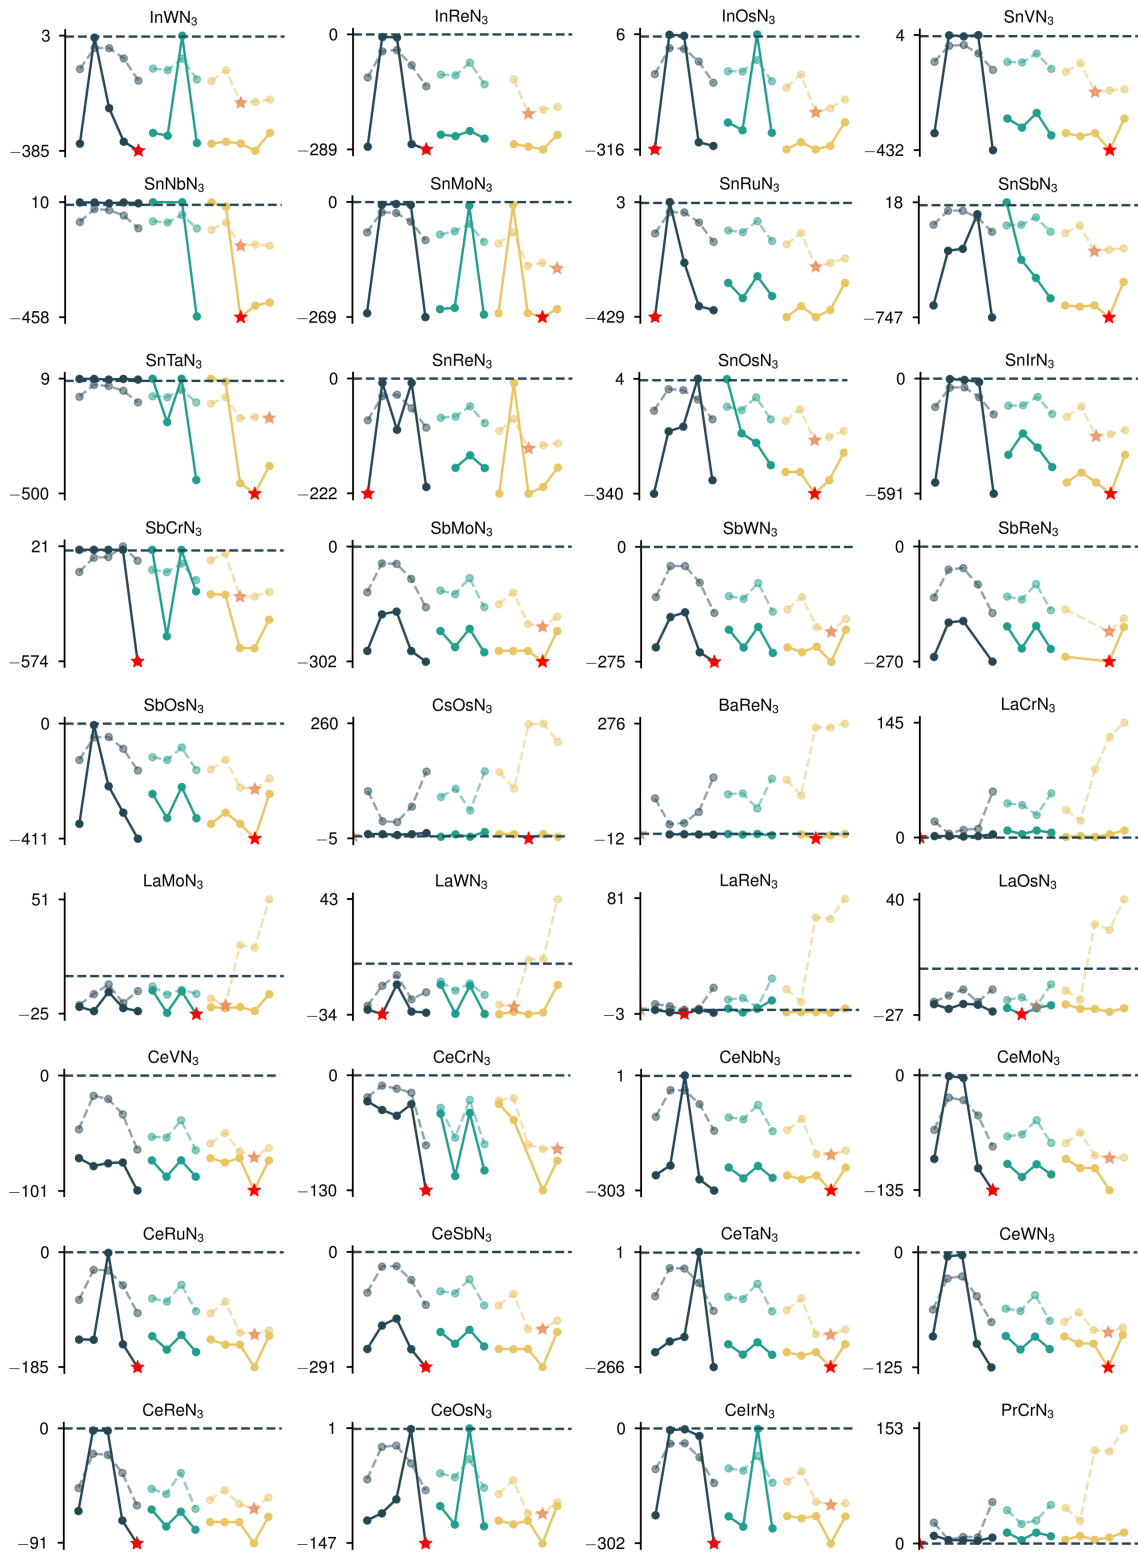

Figure S4: Energy of tilts for fixed ions (dashed lines) and full relaxation (continuous lines)



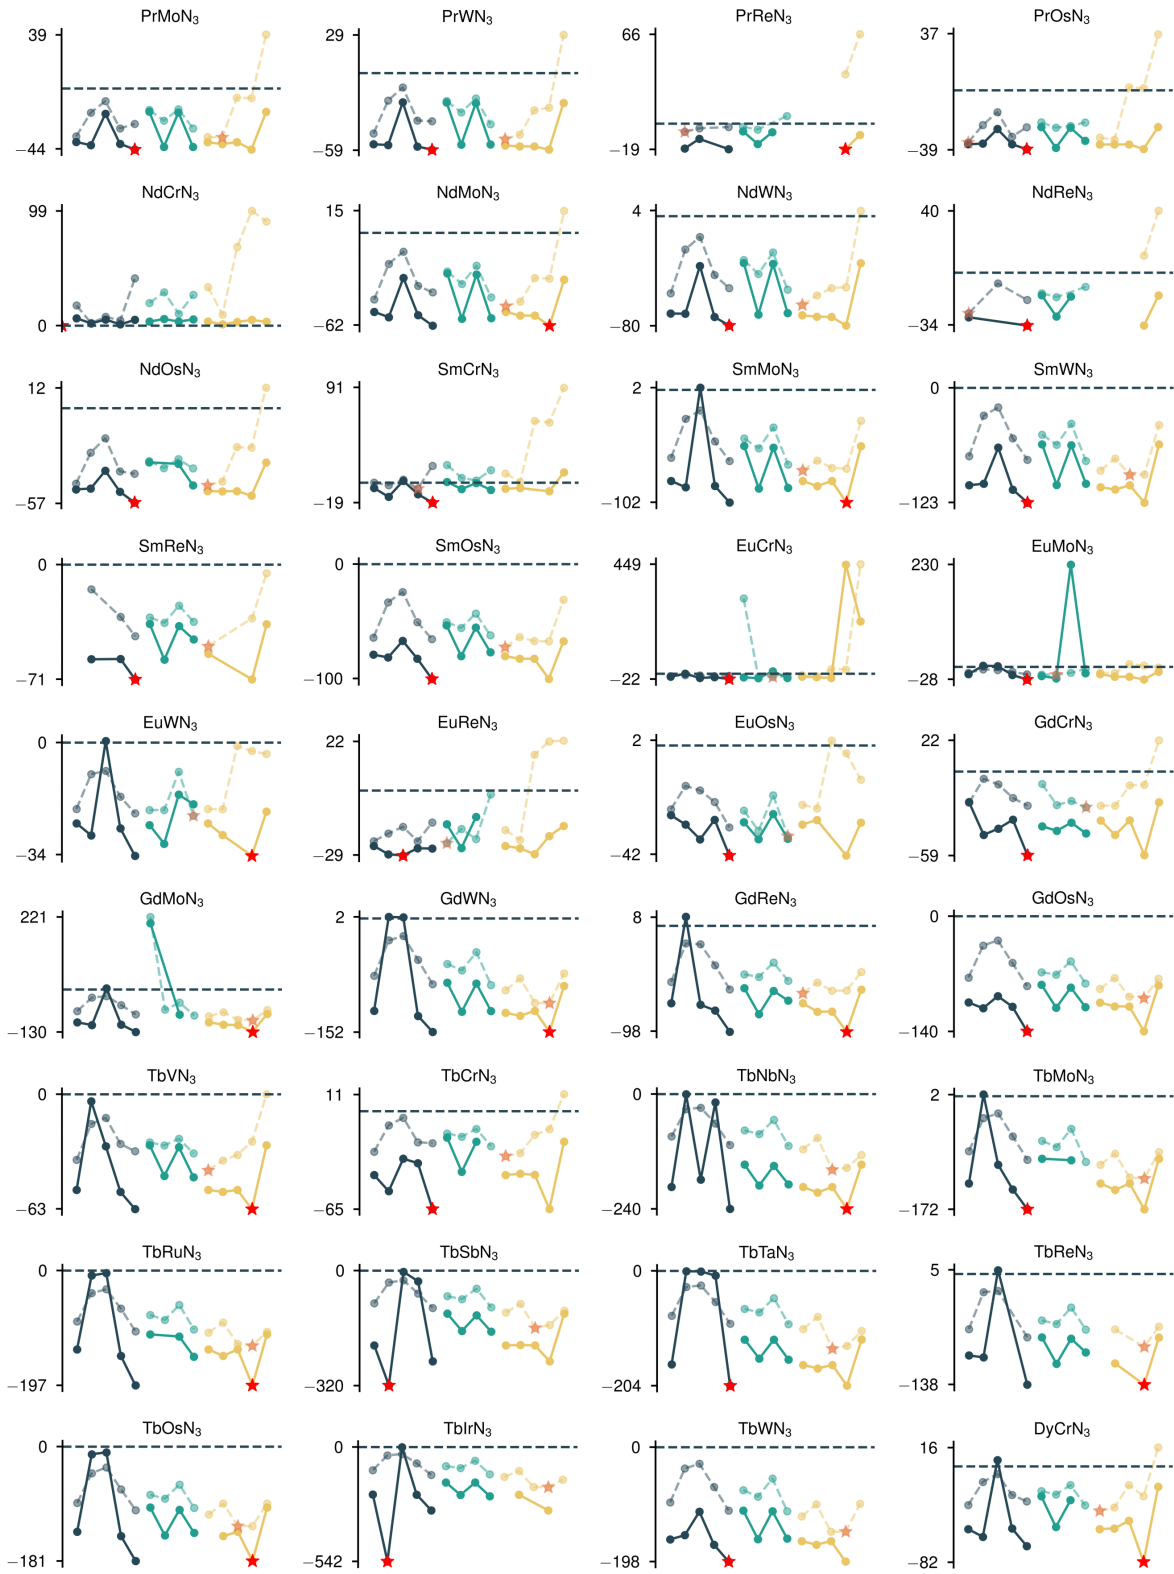

Figure S5: Energy of tilts for fixed ions (dashed lines) and full relaxation (continuous lines)

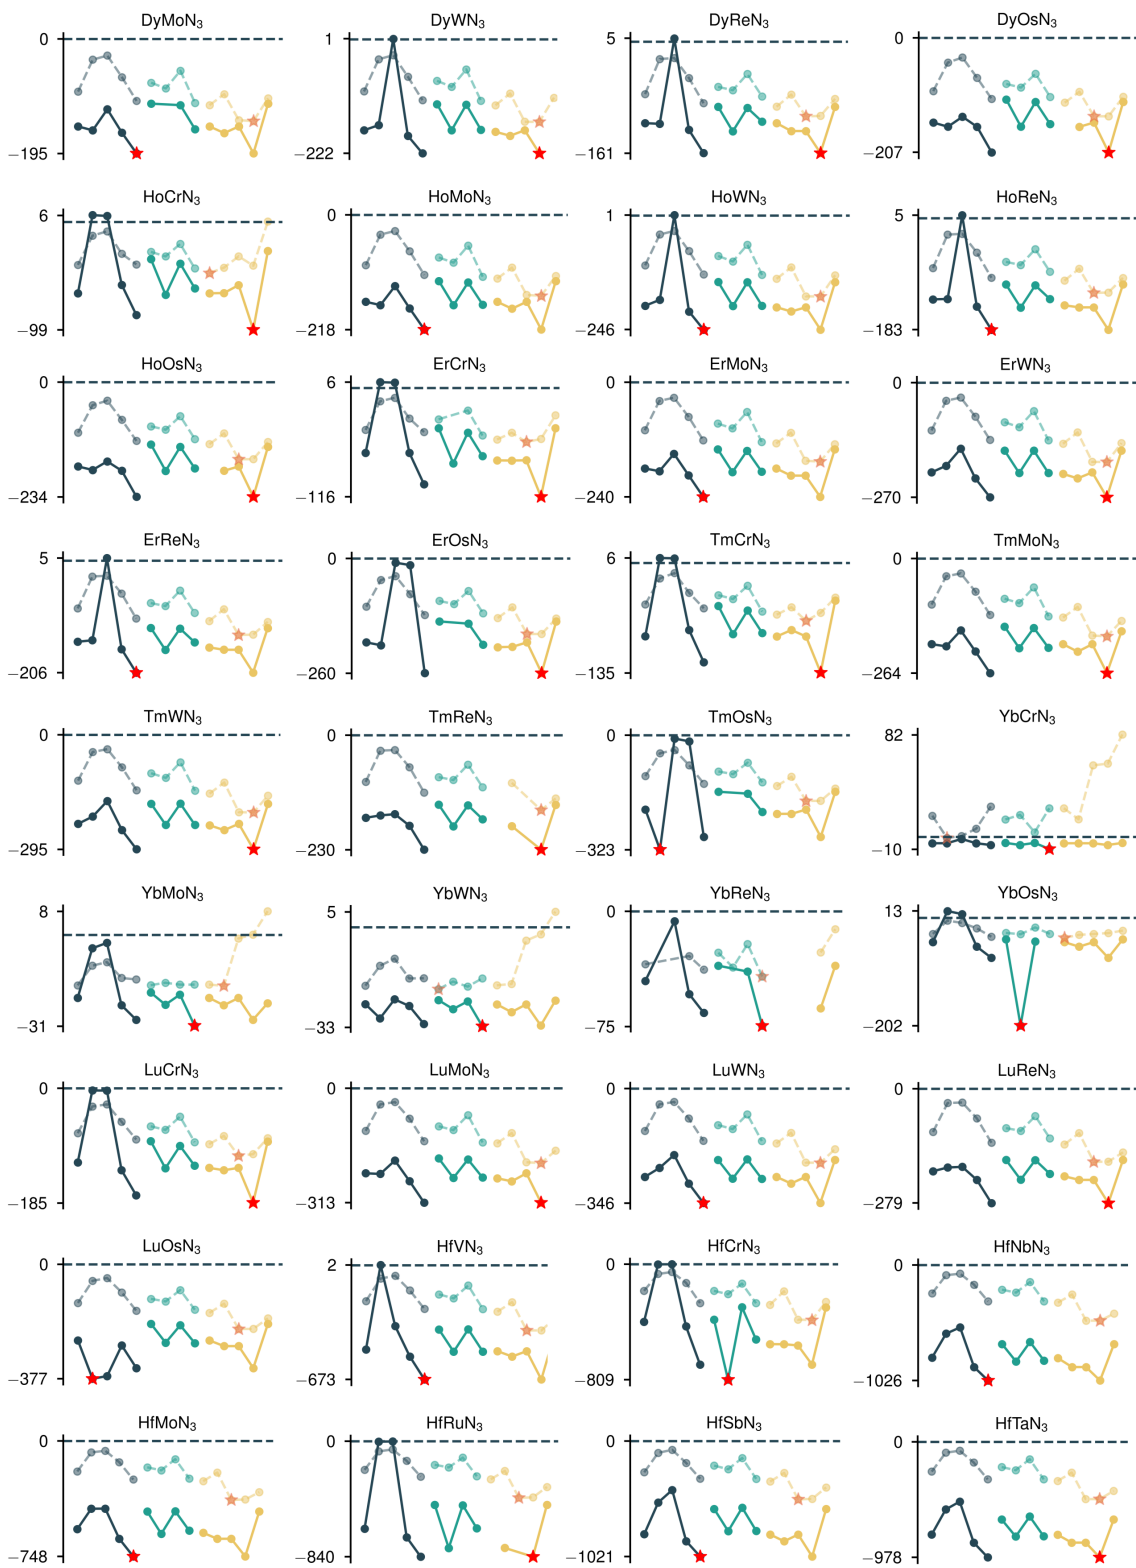

Figure S6: Energy of tilts for fixed ions (dashed lines) and full relaxation (continuous lines)

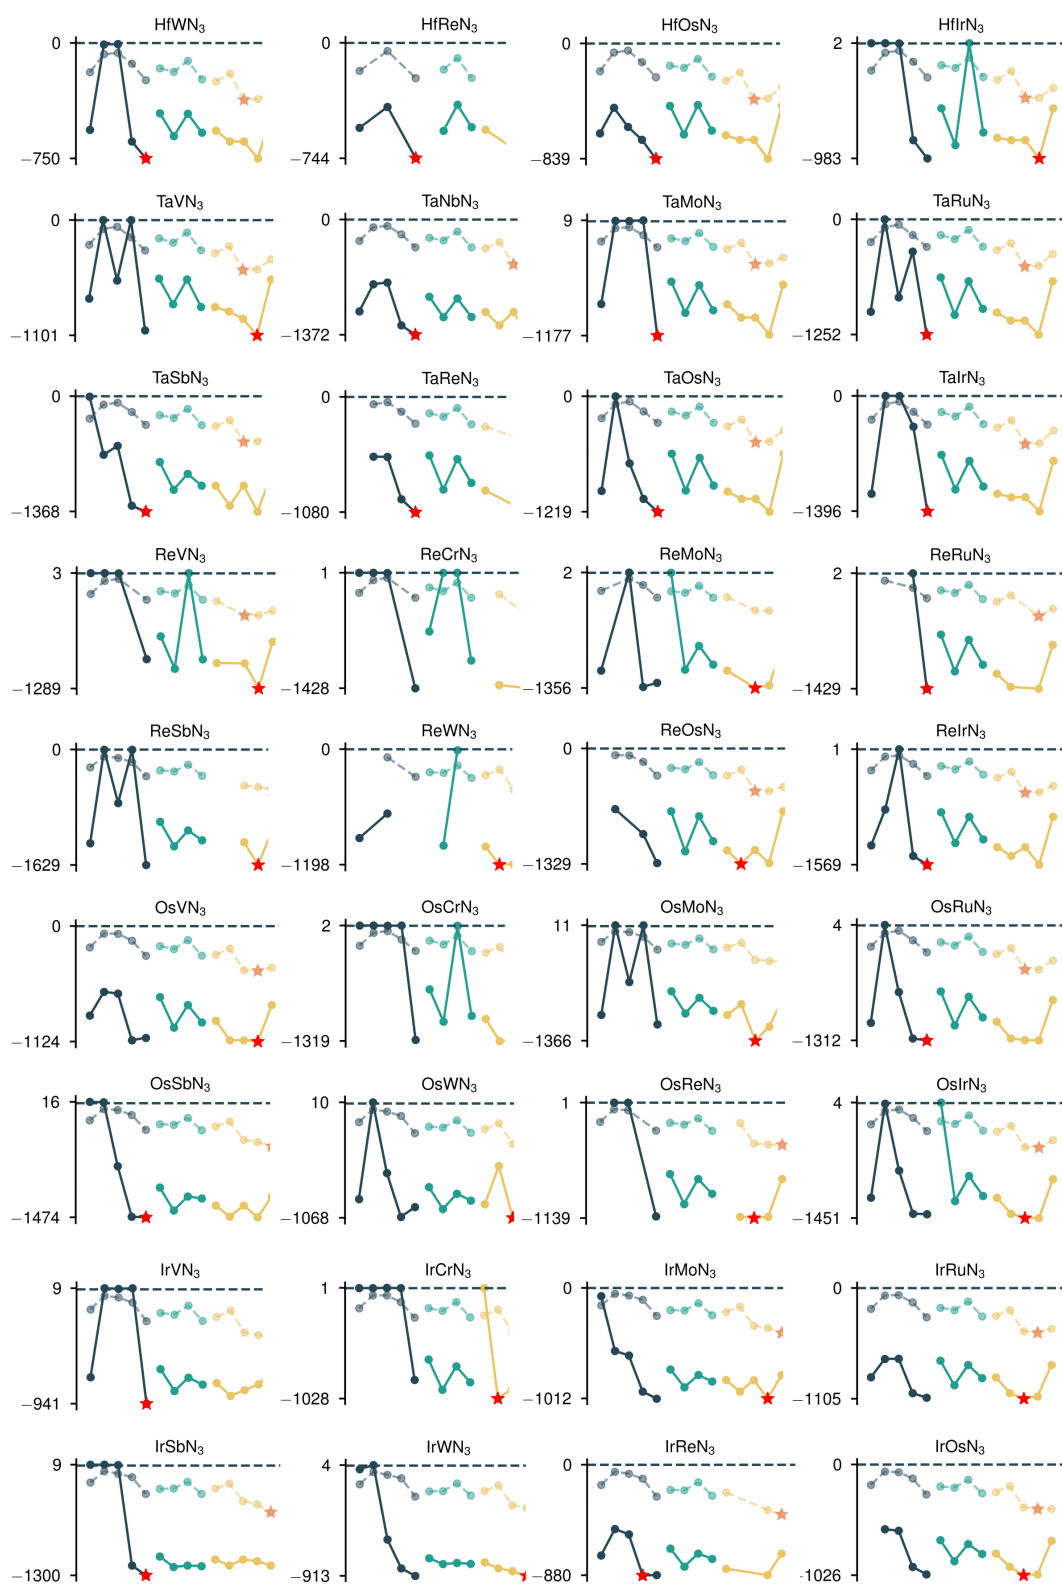

Figure S7: Energy of tilts for fixed ions (dashed lines) and full relaxation (continuous lines)

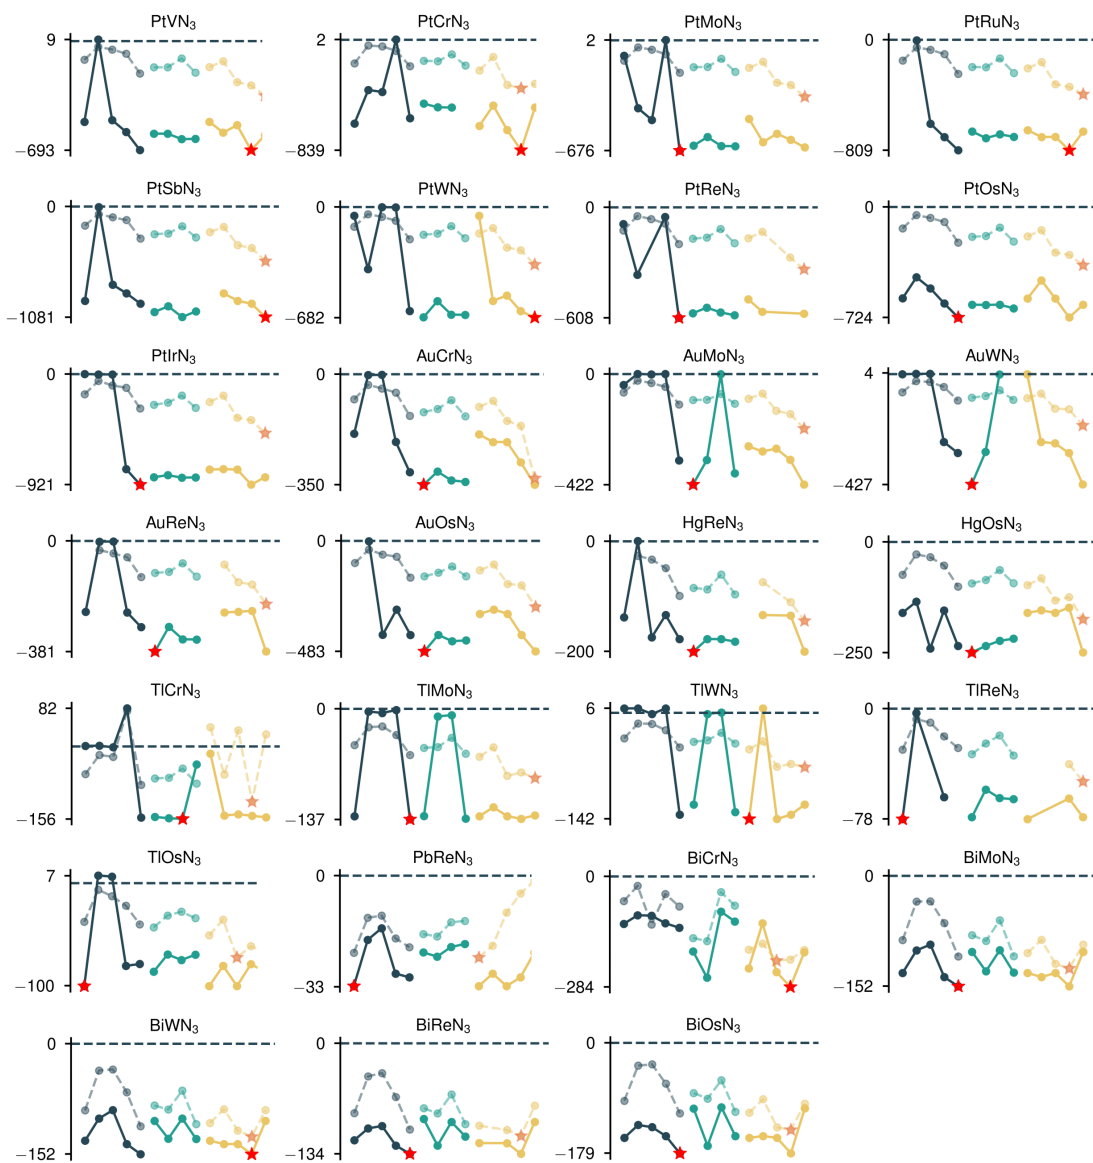

Figure S8: Energy of tilts for fixed ions (dashed lines) and full relaxation (continuous lines)

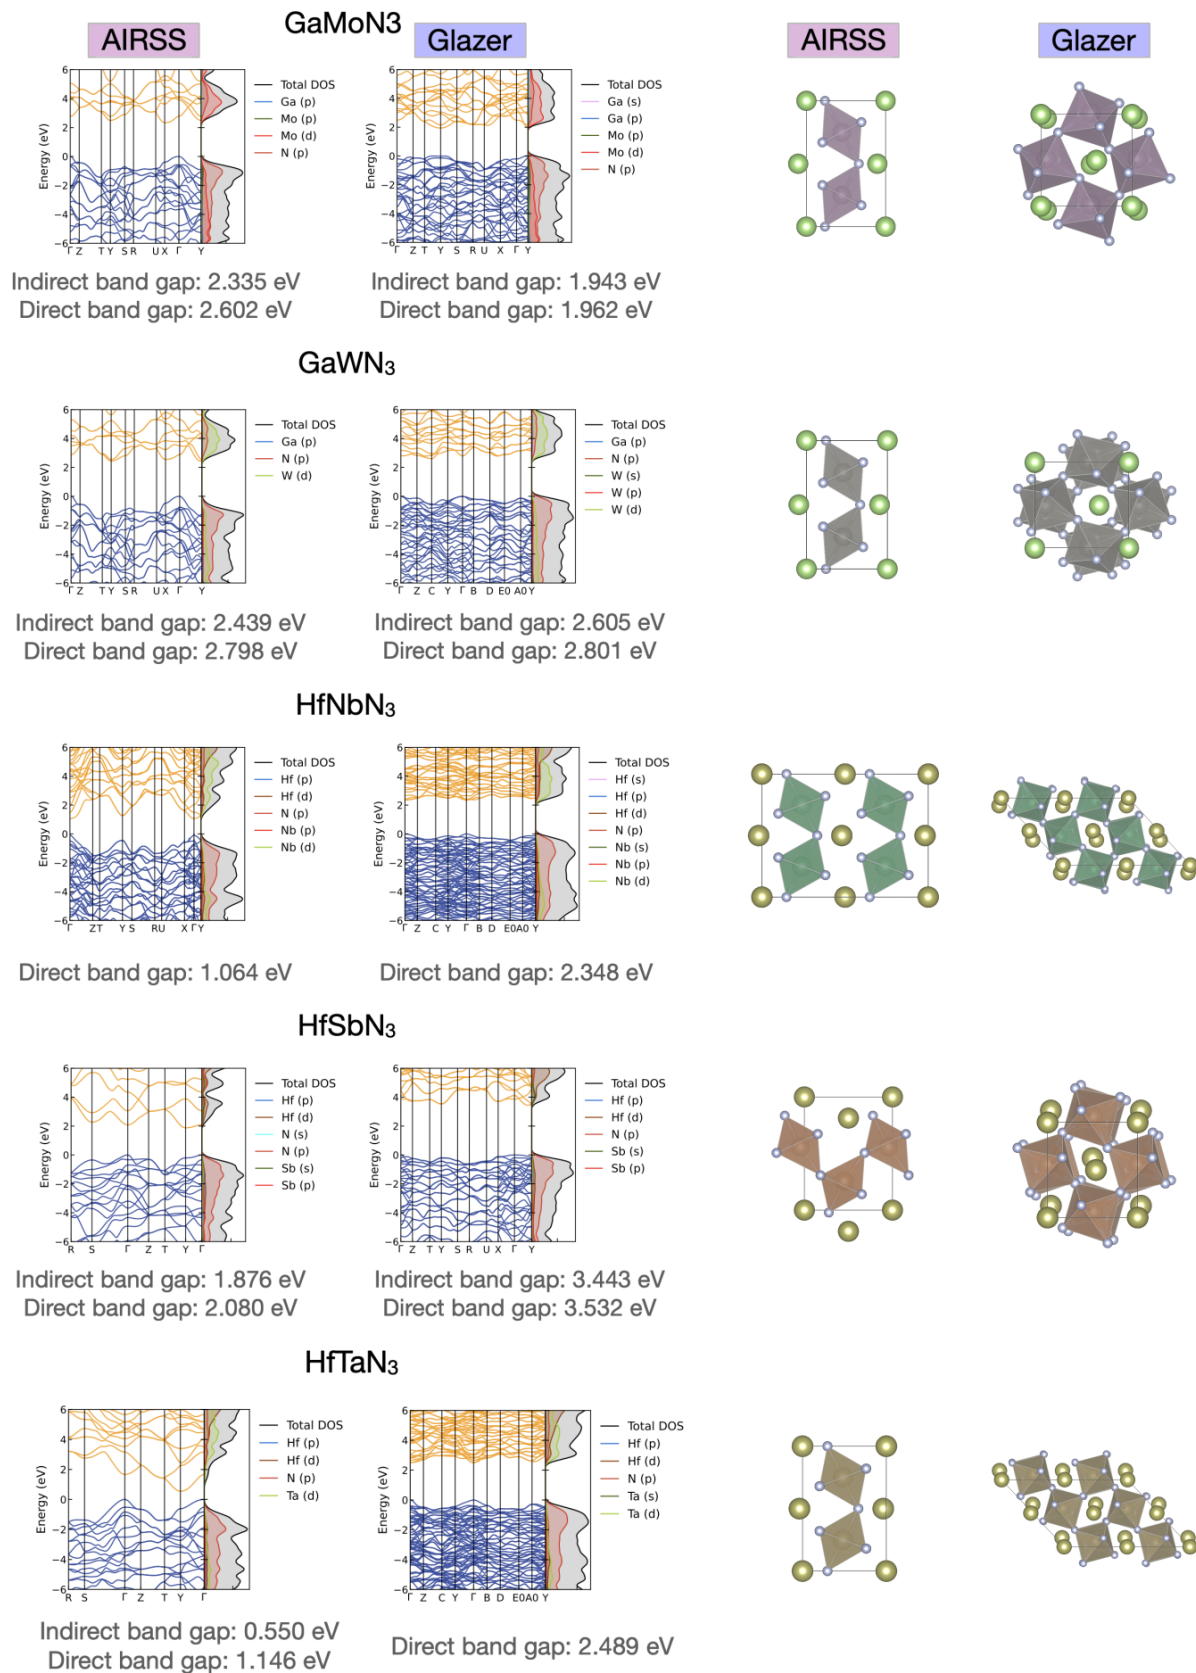

Figure S9: Electronic structure, DOS and relative crystal structures.

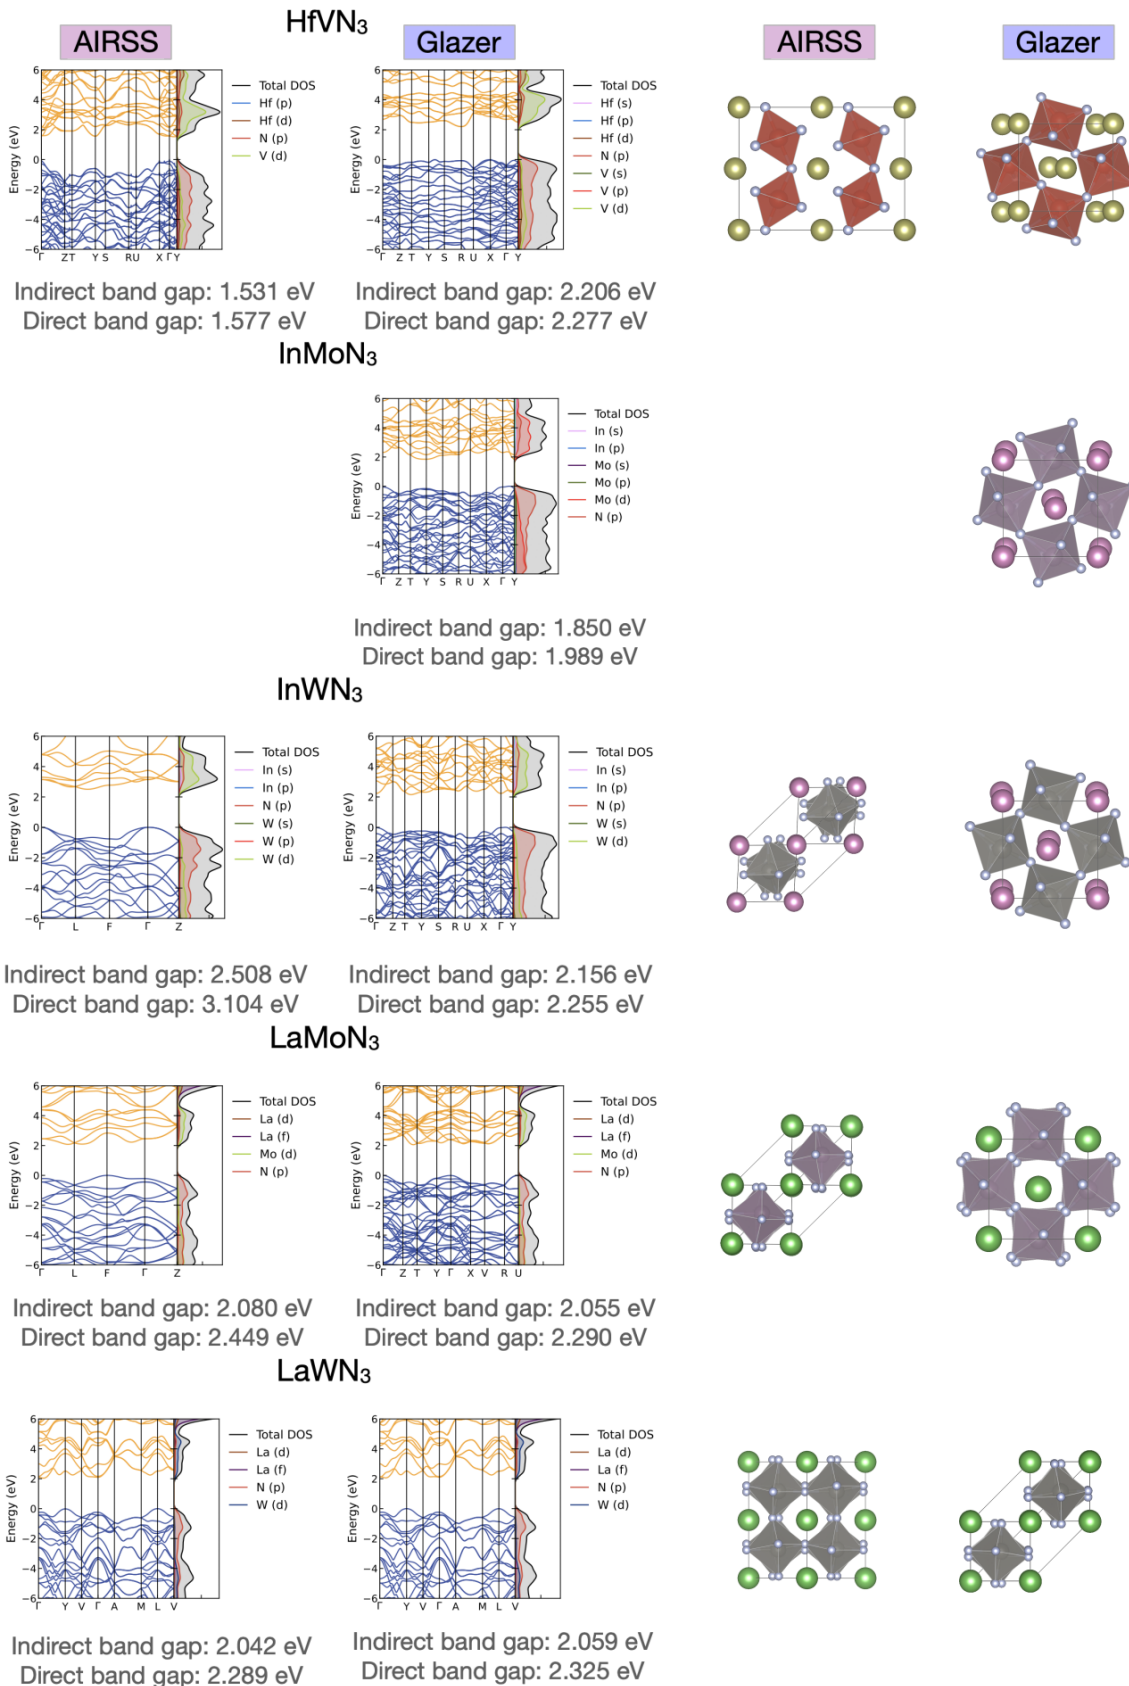

Figure S10: Electronic structure, DOS and relative crystal structures.

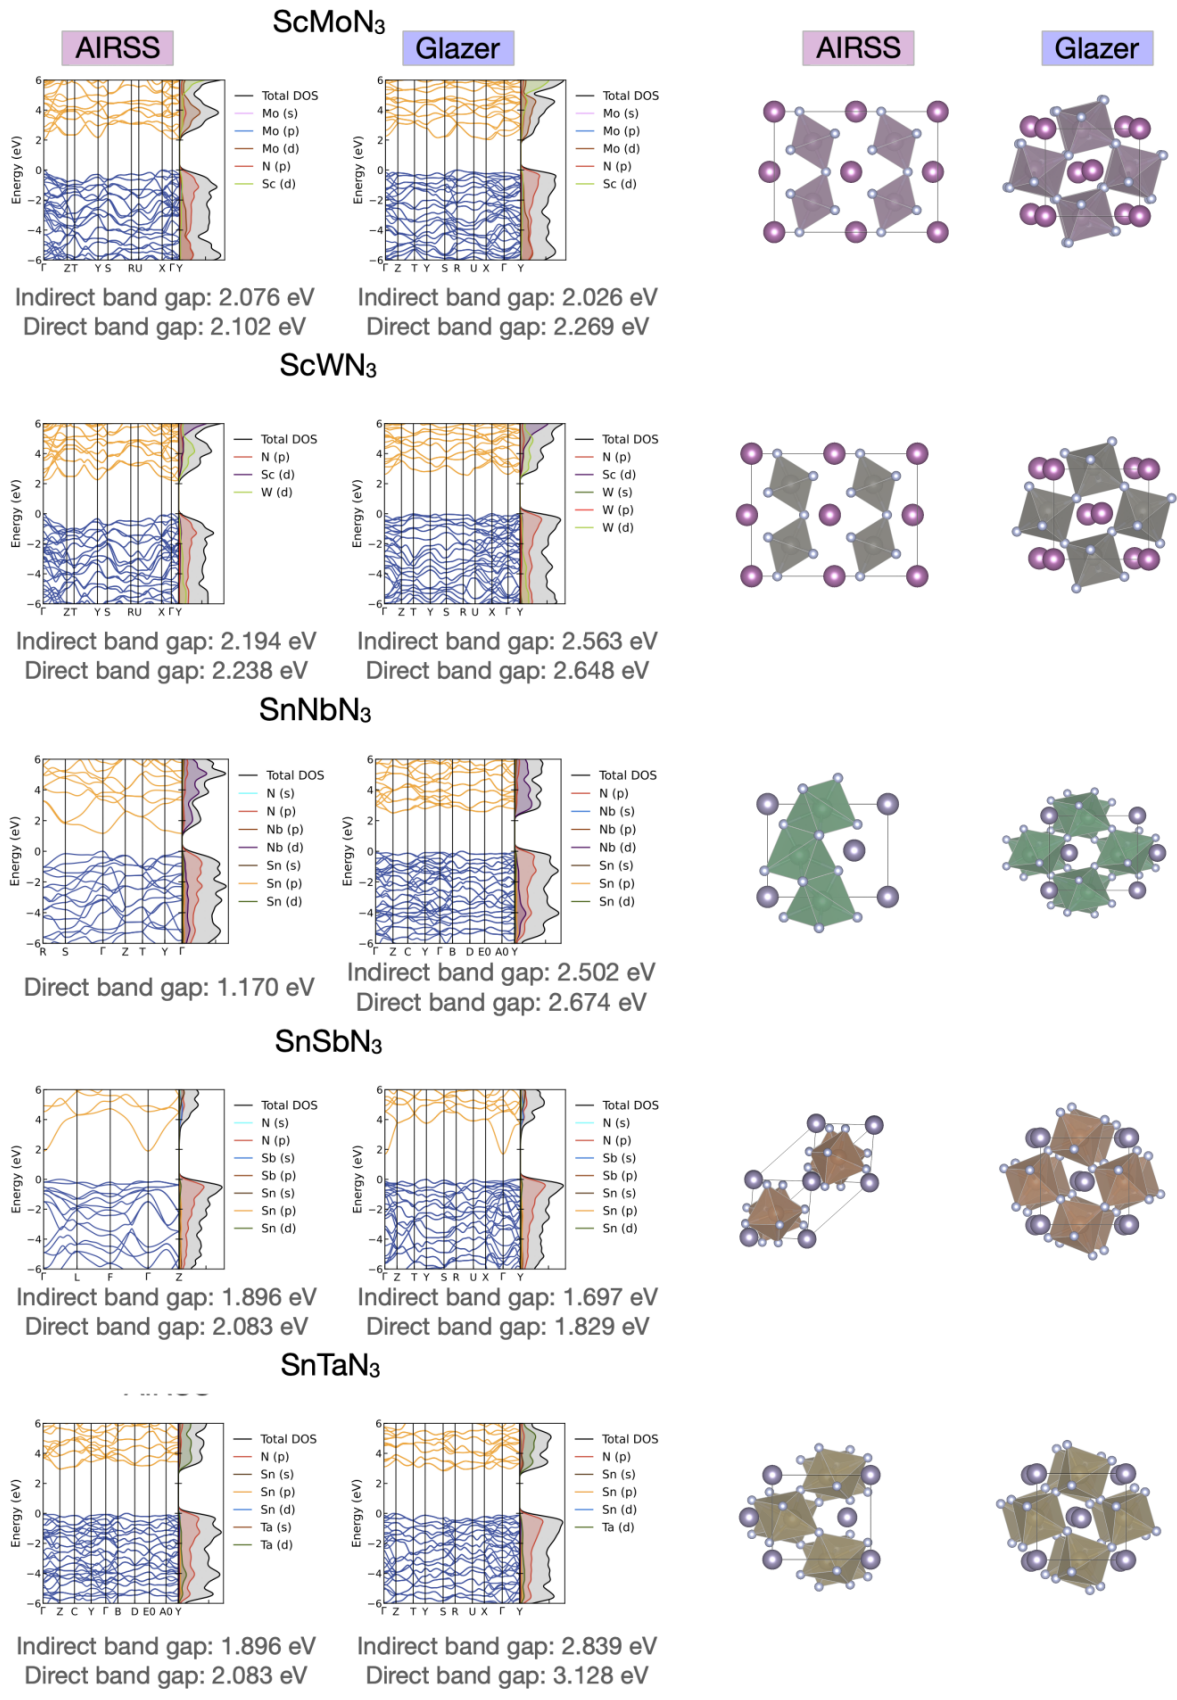

Figure S11: Electronic structure, DOS and relative crystal structures.

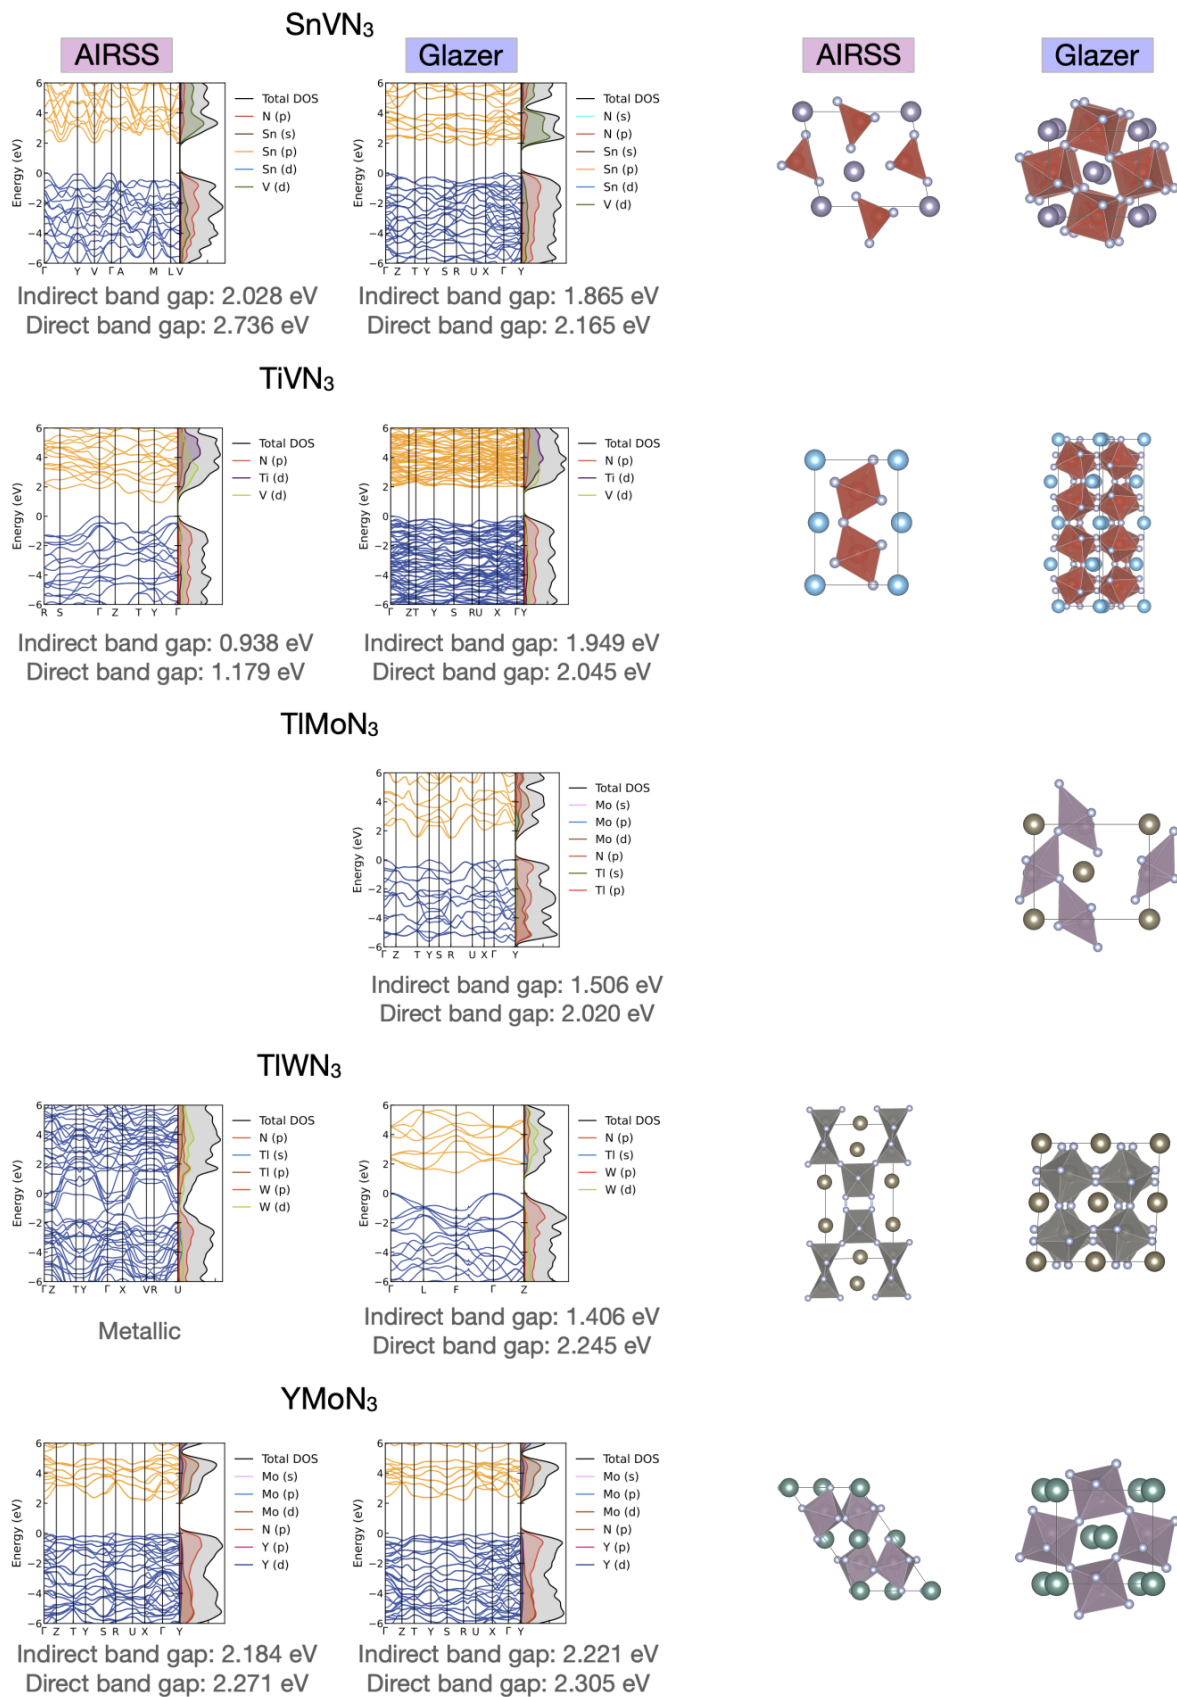

Figure S12: Electronic structure, DOS and relative crystal structures.



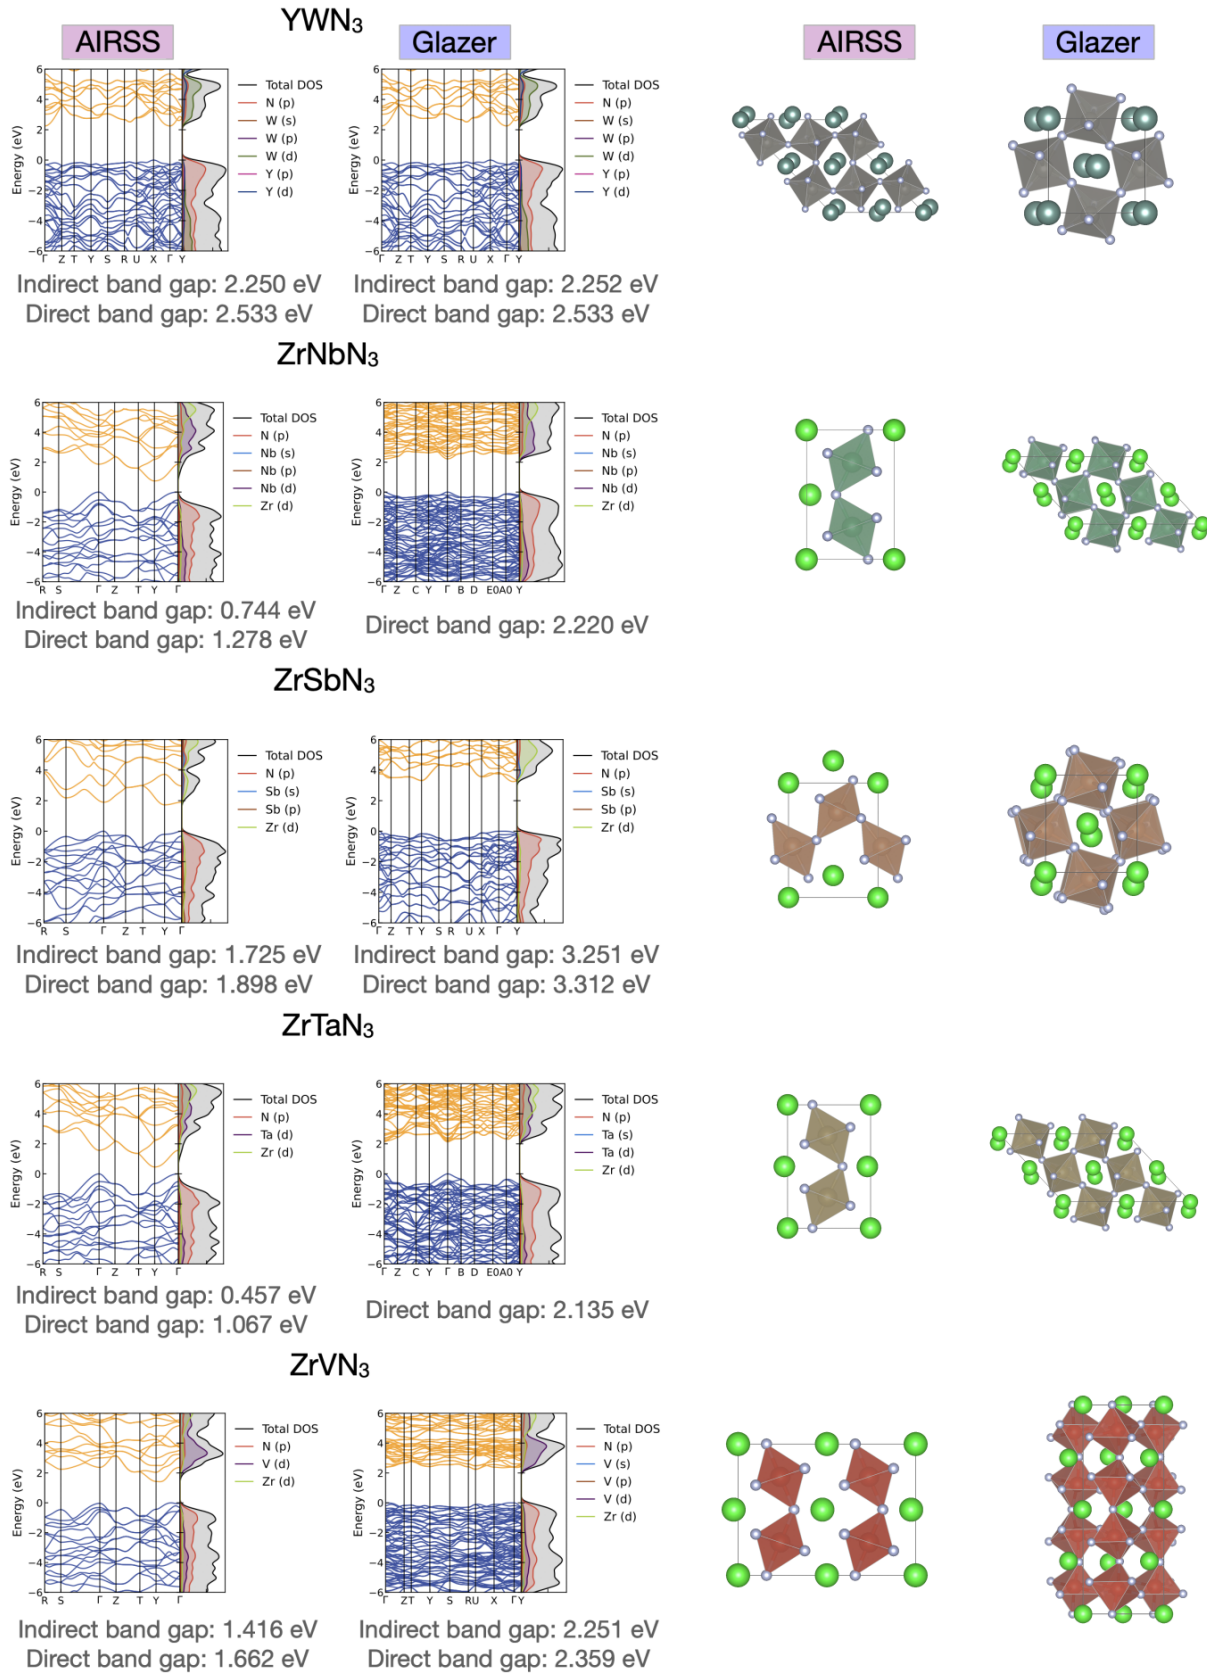

Figure S13: Electronic structure, DOS and relative crystal structures.
